# Supplementary material for: Population Status and Vulnerability of Mantidactylus pauliani from Ankaratra Protected Area, Madagascar
Source: MDPI journal article supplement (doi:10.3390/ani13172706), 2023-08-25
Supplement: s1 [file s1]

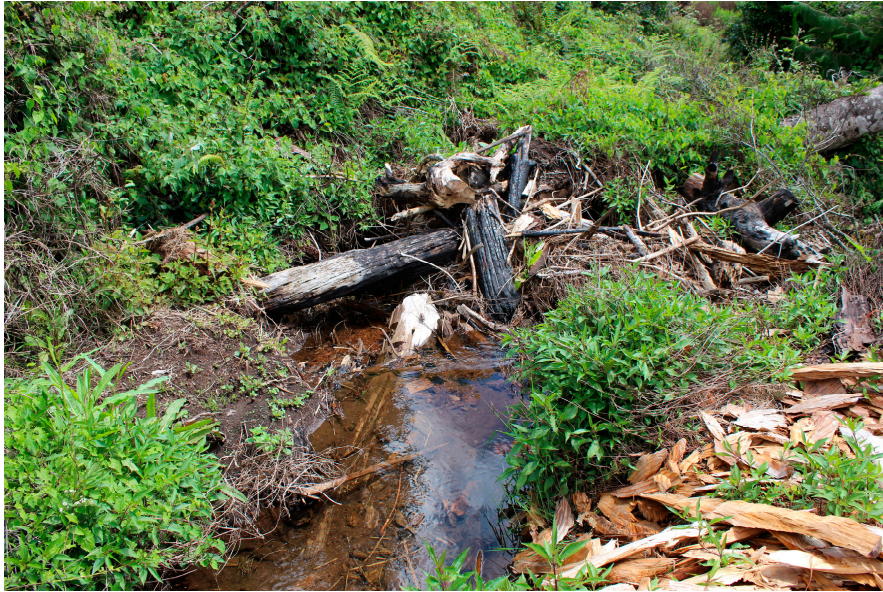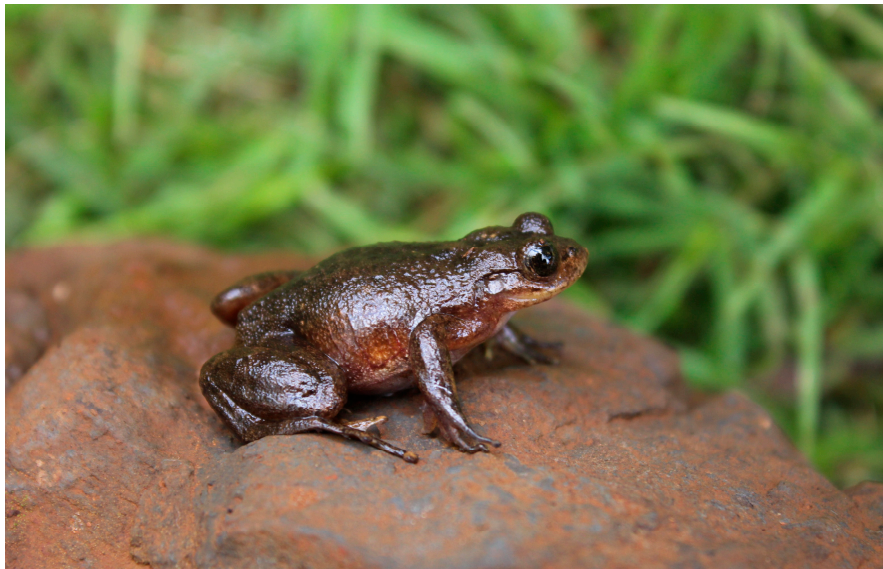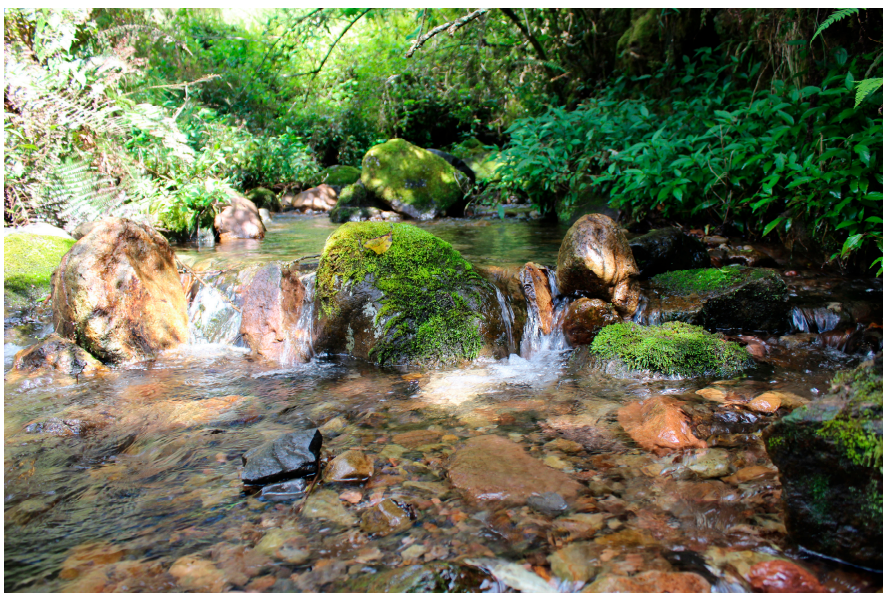

**Figure S1.** Photo of pressure and threats in Ankaratra Massif (top image). Photo of *Mantidactylus pauliani* (middle image) and its habitat (bottom image).
